# Supplementary material for: Structural basis of R-loop recognition by the S9.6 monoclonal antibody
Source: PubMed Central journal article supplement (PMC8960830; doi:10.1038/s41467-022-29187-7), 2022-03-28
Supplement: 41467_2022_29187_MOESM3_ESM.pdf [file 41467_2022_29187_MOESM3_ESM.pdf]

### **Description of Additional Supplementary Files**

File Name: Supplementary Data 1

Description: Additional oligonucleotides used in this paper
